# Supplementary material
Source: PubMed Central journal article supplement (PMC5482075)

SUPPLEMENTARY DATA

**Supplementary Table 1.** Human islet donors used in each figure.

| Figure Number               | ND donors                                                                     | T2D donors                   |
|-----------------------------|-------------------------------------------------------------------------------|------------------------------|
| Figure 1A                   | R022, R030, R047, R058,<br>H1557, H1567, H1570, H1647,<br>H1657, H1693, H1695 |                              |
| Figure 1B                   | R073, R075, R157, H744,<br>H1759                                              | R155                         |
| Figures 1C and 1D           | R058, R062, R066, H1664                                                       |                              |
| Figures 1E and 1F           | R058, R069, R072, R077,<br>H1759                                              |                              |
| Figure 2E                   | H1987, H1988, H1991                                                           |                              |
| Figure 8A                   |                                                                               | R152, R155                   |
| Figure 8B                   |                                                                               | R152, R154, R155             |
| Figure 8C                   | R022, R030, R047, R058,<br>H1557, H1567, H1570, H1647,<br>H1657, H1693, H1695 | R023, R024, R031, R054, R057 |
| Figure 8D and 8F            | R136, R145, R159                                                              | R152, R154, R155             |
| Figure 8E and 8F            |                                                                               | R057, R059, R078, R080, R083 |
| Figure 8G, 8H and 8I        | R200, R202                                                                    | R198, R201                   |
| Figure 8J and 8K            |                                                                               | R078                         |
| Figure 8L                   |                                                                               | R063, R078, R080             |
| Suppl. Figure 1             | R060, R061, H1743, H1744,<br>H1745                                            |                              |
| Suppl. Figure 5B and 5C     | R179, R180, R181, H1991,<br>H1992, H1997                                      |                              |
| Suppl. Figure 7A, 7B and 7C | R072, R074, R094                                                              | R063, R078, R080             |

*ND – no diabetes; T2D – type 2 diabetes*

SUPPLEMENTARY DATA

**Supplementary Table 2.** Characteristics of human islet donors with no diabetes. Preparations were processed by the Alberta Diabetes Institute Isletcore (Donor Numbers with ‘R’) or the Clinical Islet Laboratory at the University of Alberta (Donor Numbers with ‘H’).

| Donor Number | Age (years) | Sex | Donor Type | Cause of Death (if known) | BMI  | HbA1c | CIT (hours) | Isolation Purity (%) |
|--------------|-------------|-----|------------|---------------------------|------|-------|-------------|----------------------|
| R022         | 48          | F   | NDD        |                           | 18.0 |       | 21.5        | 30                   |
| R030         | 80          | F   | NDD        | SAH/CVA/SIH               | 21.9 |       | 12.0        | 90                   |
| R047         | 56          | F   | NDD        | SAH/CVA/SIH               | 32.0 |       | 17.0        | 50                   |
| R058         | 79          | F   | NDD        | SAH/CVA/SIH               | 23.8 | 5.8   | 16.5        | 75                   |
| R060         | 54          | F   | NDD        | Cardiac Arrest            | 21.1 | 5.8   | 17          | 90                   |
| R061         | 63          | M   | NDD        | SAH/CVA/SIH               | 37.6 | 5.7   | 11          | 80                   |
| R062         | 41          | M   | NDD        | SAH/CVA/SIH               | 19.7 | 5.2   | 9.3         | 90                   |
| R066         | 44          | M   | NDD        | Anoxia                    | 32.2 |       | 12.0        | 80                   |
| R069         | 74          | F   | NDD        |                           | 25.1 |       | 23.3        | <10                  |
| R072         | 54          | F   | NDD        | SAH/CVA/SIH               | 30.6 | 6.2   | 10.1        | 90                   |
| R073         | 74          | F   | NDD        | SAH/CVA/SIH               | 28.3 | 5.4   | 13.0        | 90                   |
| R074         | 55          | M   | DCD        | Head Injury/Trauma        | 26.4 | 5.5   | 15.0        | 10                   |
| R075         | 27          | M   | NDD        | Fentanyl overdose         | 26.2 | 5.4   | 15.3        | 50                   |
| R077         | 54          | F   | NDD        | Head Injury/Trauma        | 24.7 | 5.2   | 15.0        | 90                   |
| R094         | 46          | F   | NDD        | Head Injury/Trauma        | 28.1 | 5.8   | 23.8        | 70                   |
| R136         | 60          | F   | NDD        | SAH/CVA/SIH               | 36.3 | 6.2   | 18.0        | 50                   |
| R145         | 55          | F   | NDD        | SAH/CVA/SIH               | 24.1 | 5.5   | 13.5        | 80                   |
| R159         | 60          | M   | NDD        | SAH/CVA/SIH               | 30.4 | 5.5   | 2.0         | 70                   |
| R179         | 61          | M   | NDD        | Cardiac Arrest            | 25.1 | 5.7   | 7.3         | 80                   |
| R180         | 68          | F   | NDD        | SAH/CVA/SIH               | 21.7 | 5.9   | 23.3        | 95                   |
| R181         | 42          | F   | DCD        | Head Injury/Trauma        | 29.4 | 6.0   | 19.3        | 95                   |
| R200         | 65          | M   | NDD        | SAH/CVA/SIH               | 27.1 | 5.1   | 17.5        | 95                   |
| R202         | 68          | F   | NDD        | Head Injury/Trauma        | 25.2 | 5.7   | 16.5        | 90                   |
| H1557        | 27          | F   | NDD        | Anoxia                    | 21.6 | 5.8   | 5.5         | 55                   |
| H1567        | 52          | F   | NDD        | SAH/CVA/SIH               | 21.8 | 6.0   | 9.3         | 40                   |
| H1570        | 45          | M   | NDD        | Encephalitis              | 25.7 | 6.3   | 4.8         | 53                   |
| H1647        | 62          | F   | NDD        | SAH/CVA/SIH               | 25.9 | 5.3   | 7.5         | 90                   |
| H1657        | 49          | F   | NDD        | SAH/CVA/SIH               | 29.5 | 6.3   | 4.8         | 65                   |
| H1664        | 60          | M   | NDD        | Head Injury/Trauma        | 30.4 | 5.9   | 11.3        | 80                   |
| H1693        | 51          | F   | NDD        | SAH/CVA/SIH               | 29.9 | 6.2   | 13.5        | 40                   |
| H1695        | 47          | M   | NDD        | Head Injury/Trauma        | 21.4 | 5.8   | 4.3         | 39                   |
| H1743        | 73          | F   | NDD        | SAH/CVA/SIH               | 21.7 | 5.4   | 10.8        | 43                   |
| H1744        | 56          | F   | NDD        | SAH/CVA/SIH               | 16.7 | 5.9   | 14.3        | 30                   |
| H1745        | 47          | M   | NDD        | Head Injury/Trauma        | 25.9 | 6.4   | 8.8         | 25                   |
| H1759        | 48          | M   | NDD        | SAH/CVA/SIH               | 26.0 | 5.2   | 7.3         | 45                   |
| H1987        | 36          | F   | NDD        | Anoxia                    | 28.8 | 5.8   | 10.8        | 40                   |
| H1988        | 61          | M   | NDD        | SAH/CVA/SIH               | 29.0 | 6.0   | 11.0        | 40                   |
| H1991        | 54          | F   | NDD        | SAH/CVA/SIH               | 22.2 | 6.1   | 11.8        | 30                   |
| H1992        | 63          | F   | NDD        | Anoxia                    | 21.5 | 5.3   | 10.8        | 40                   |
| H1997        | 75          | M   | NDD        | Anoxia                    | 26.0 | 6.0   | 11.5        | 48                   |
| Average      | 55.9        |     |            |                           | 26.0 | 5.8   | 12.7        | 61.3                 |
| SEM          | 2.0         |     |            |                           | 0.7  | 0.1   | 0.8         | 4.1                  |

*NDD – neurological determination of death; DCD – donation after cardio-circulatory death; SAH – subarachnoid hemorrhage; CVA – cerebrovascular accident (stroke); SIH – spontaneous intracranial hemorrhage*

SUPPLEMENTARY DATA

**Supplementary Table 3.** Characteristics of human islet donors with type 2 diabetes (T2D). All preparations were processed by the Alberta Diabetes Institute Isletcore.

| Donor Number | Age (years) | Sex | Donor Type | Cause of Death (if known) | BMI  | HbA1c | Years T2D (if known) | T2D Medications       | CIT (hours) | Isolation Purity (%) |
|--------------|-------------|-----|------------|---------------------------|------|-------|----------------------|-----------------------|-------------|----------------------|
| R023         | 65          | M   | NDD        | Anoxia                    | 29.3 | 8.3   |                      | unknown               | 44.5        | 30                   |
| R024         | 52          | F   | NDD        |                           | 29.0 |       | 5                    | unknown               | 23.0        | 45                   |
| R031         | 54          | M   | NDD        | SAH/CVA/SIH               | 30.0 | 7.2   |                      | unknown               | 13.0        | 50                   |
| R054         | 73          | F   | NDD        |                           | 22.4 | 6.1   | 5                    | unknown               |             | 60                   |
| R057         | 53          | F   | NDD        | SAH/CVA/SIH               | 35.5 | 10.3  | 20                   | metformin             | 15.0        | 10                   |
| R059         | 68          | F   | NDD        |                           | 28.1 |       |                      | unknown               | 13.1        | 70                   |
| R063         | 57          | F   | NDD        | Anoxia                    | 23.0 | 6.1   | 2                    | unknown               | 12.0        | 95                   |
| R078         | 47          | F   | NDD        | Cardiac Arrest            | 35.3 | 5.9   | 6                    | unknown               | 11.0        | 5                    |
| R080         | 57          | M   | NDD        | Head Injury/Trauma        | 28.3 | 5.8   | 5                    | metformin             | 10.0        | 75                   |
| R083         | 71          | F   | NDD        | Anoxia                    | 27.5 | 6.6   | 20                   | unknown               | 11.5        | 75                   |
| R152         | 54          | F   | DCD        | SAH/CVA/SIH               | 42.6 | 8.3   | 4                    | metformin, gliclazide | 14.5        | 5                    |
| R154         | 57          | F   | NDD        | SAH/CVA/SIH               | 40.8 | 7.2   | 4                    | metformin             | 6.0         | 20                   |
| R155         | 56          | M   | DCD        | Cardiac Arrest            | 34.0 | 6.3   | 2                    | gliclazide            | 18.5        | 50                   |
| R198         | 47          | F   | DCD        |                           | 29.7 | 5.4   | 10                   | unknown               | 12.5        | 50                   |
| R201         | 69          | M   | NDD        | Head Injury/Trauma        | 32.2 | 6.7   |                      | unknown               | 18.8        | 90                   |
| Average      | 58.7        |     |            |                           | 31.2 | 6.9   | 7.5                  |                       | 16.0        | 48.7                 |
| SEM          | 2.1         |     |            |                           | 1.5  | 0.4   | 2.0                  |                       | 2.5         | 7.7                  |

*NDD* – neurological determination of death; *DCD* – donation after cardio-circulatory death; *SAH* – subarachnoid hemorrhage; *CVA* cerebrovascular accident (stroke); *SIH* – spontaneous intracranial hemorrhage

SUPPLEMENTARY DATA

**Supplementary Figure 1.** Pharmacologic Kv2 inhibition does not enhance insulin secretion from human islets.

Insulin secretion was measured from human islets at 1 or 16.7 mM glucose in the presence or absence of the Kv2.1/2.2 inhibitor stromatoxin (STX, 100 nM), or the non-selective Kv channel inhibitor tetraethylammonium TEA, 10 mM). Data are from 5 separate human islet donors. \*p<0.05 compared with the 1 mM glucose condition, or as indicated.

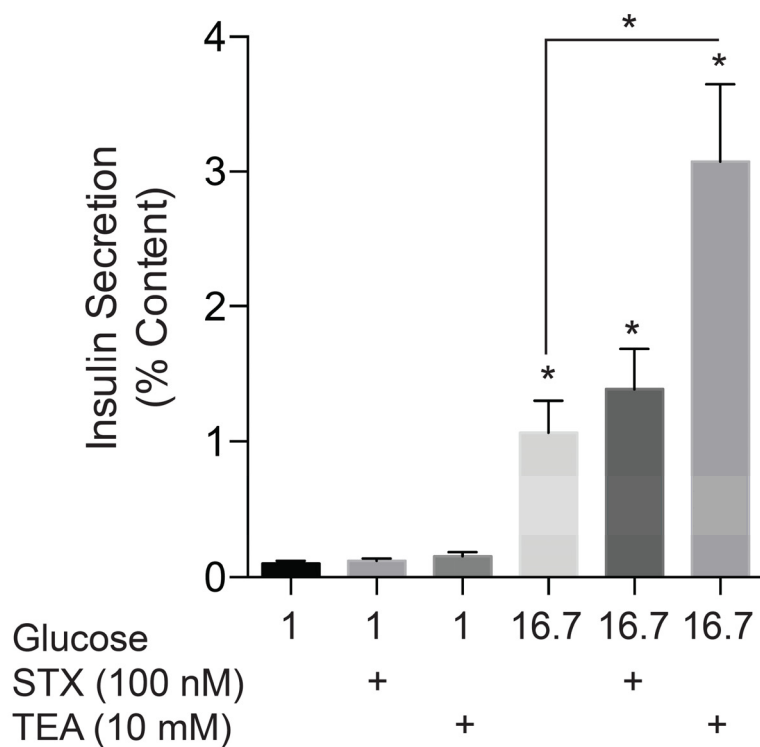

SUPPLEMENTARY DATA

**Supplementary Figure 2.** Knockdown of the Kv2.1 isoform selectively impairs depolarization-induced exocytosis in INS 832/13 cells.

A) Expression of mRNA for Kv2.1 (*Kcnb1*) or Kv2.2 (*Kcnb2*) in INS 832/13 cells following infection with adenovirus expressing scrambled shRNA (Ad-shScrambled), or targeting Kv2.1 (Ad-shKv2.1) or Kv2.2 (Ad-shKv2.2).

n=3 separate experiments.

B) Current-voltage-relationship of Kv currents recorded by whole-cell voltage-clamp from a holding potential of -70 mV in INS 832/13 cells transduced with adenovirus as indicated. n=27,20,18,19 cells.

C) Cumulative exocytotic responses to a series of 10 membrane depolarizations from -70 to 0 mV by INS 832/13 cells transduced with adenovirus as indicated. n=15,16,11,16 cells.

\*-p<0.05, \*\*-p<0.01, and \*\*\*-p<0.001 compared with Ad-sh-Scrambled.

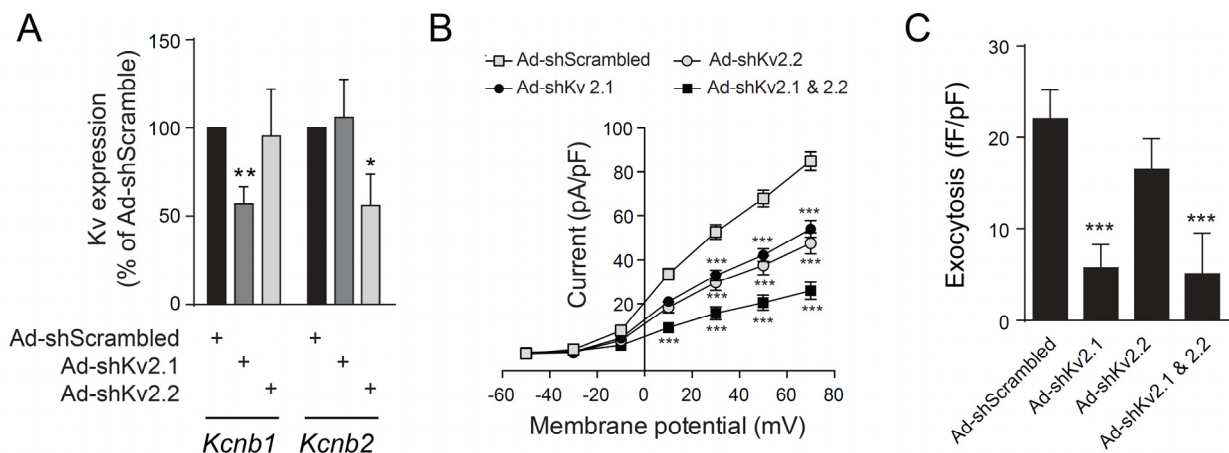

SUPPLEMENTARY DATA

**Supplementary Figure 3.** Separation of mCherry-Kv2.1-WT and NPY-Venus signals.

INS 832/13 cells were expressing either mCherry-Kv2.1-WT alone (red), NPY-Venus alone (green) or both, and imaged using TIRF microscopy as outlined in the Methods. Bleedthrough between channels was not detected. In the bottom example two cells transfected with NPY-Venus are shown, only one of which is co-expressing mCherry-Kv2.1-WT.

In some of these images (i.e. the negative green - top left -, and negative red - middle) we have increased the brightness relative to other images in order to detect possible bleed-through.

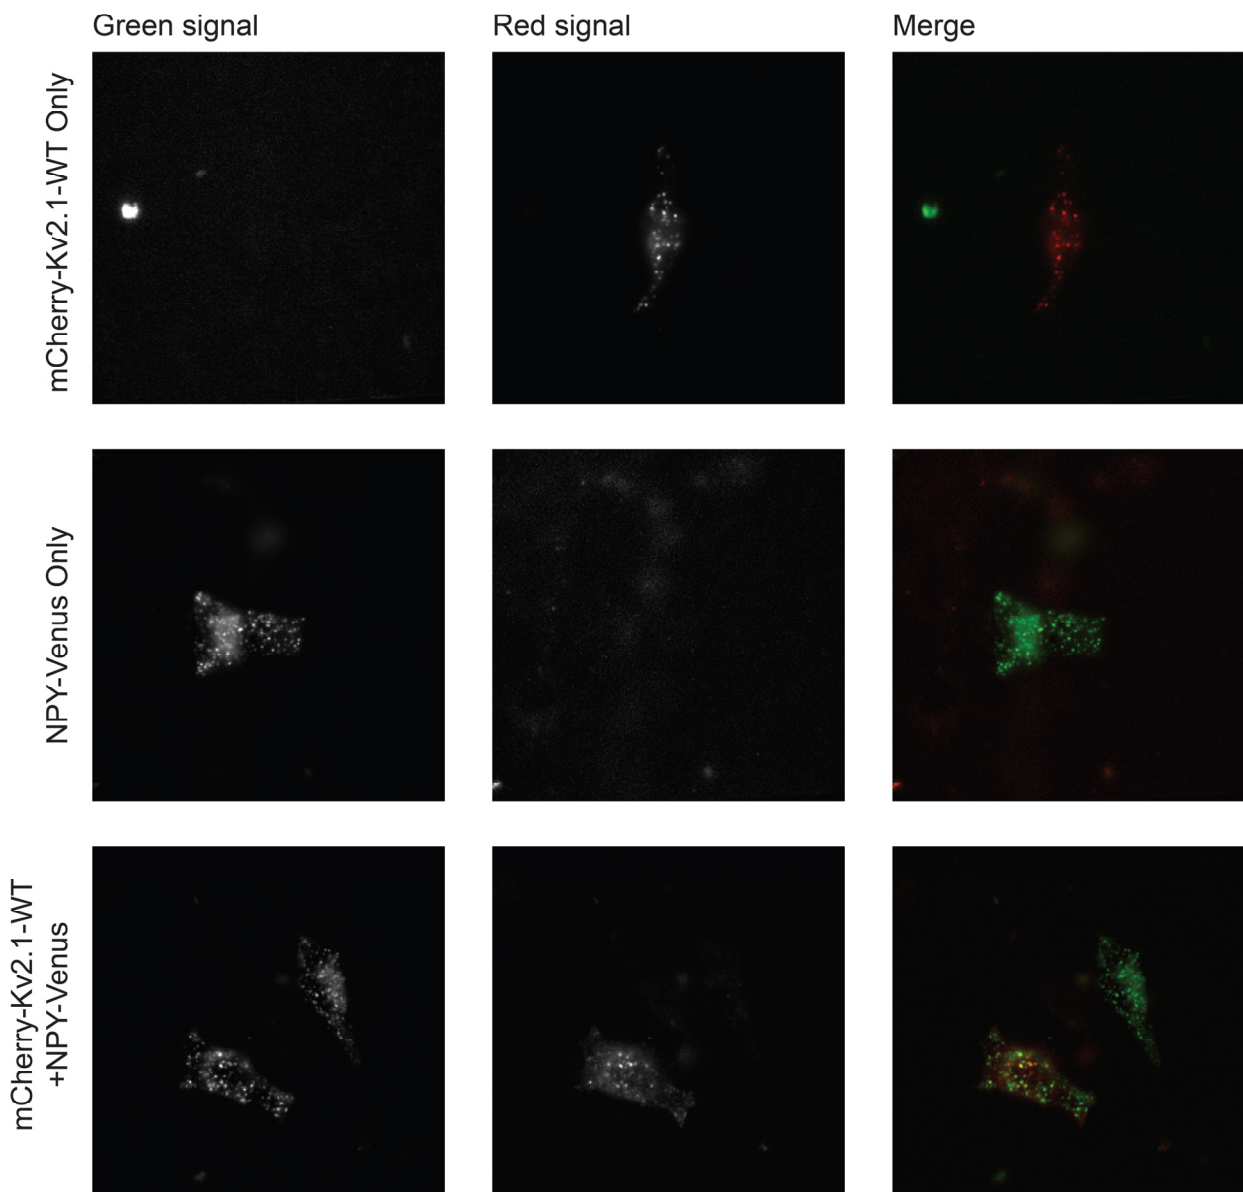

## SUPPLEMENTARY DATA

**Supplementary Figure 4.** Wild-type (wt) and clustering-deficient ( $\Delta$ C318) Kv2.1 tagged with mCherry mediate identical outward K<sup>+</sup> currents, but only the wild-type channel facilitates exocytosis.

A) mCherry-Kv2.1-WT and mCherry-Kv2.1- $\Delta$ C318 visualized in HEK 293 and INS 832/13 cells by total internal reflection fluorescence (TIRF) microscopy.

B) The clustering-deficient mutant ( $\Delta$ C318) forms fewer membrane-localized clusters in both HEK 293 (n=8, 9 cells) and INS 832/13 cells (n=20, 22 cells).

C) Current-voltage relationship of outward K<sup>+</sup> currents mediated by mCherry-Kv2.1-WT and mCherry-Kv2.1- $\Delta$ C318 expressed in HEK 293 cells. Representative traces (left) and averaged data (right) are shown. n=20, 20 cells.

D) Exocytosis was elicited by a series of 10 depolarizations from -70 to 0 mV in INS 832/13 cells transfected with control plasmid (mCherry), mCherry-Kv2.1-WT, or mCherry-Kv2.1- $\Delta$ C318. Representative capacitance traces (left) and averaged cumulative responses (right) are shown. n=29, 31, 32 cells.

\*-p<0.05 and \*\*\*-p<0.001 compared with the wild-type or mCherry groups.

SUPPLEMENTARY DATA

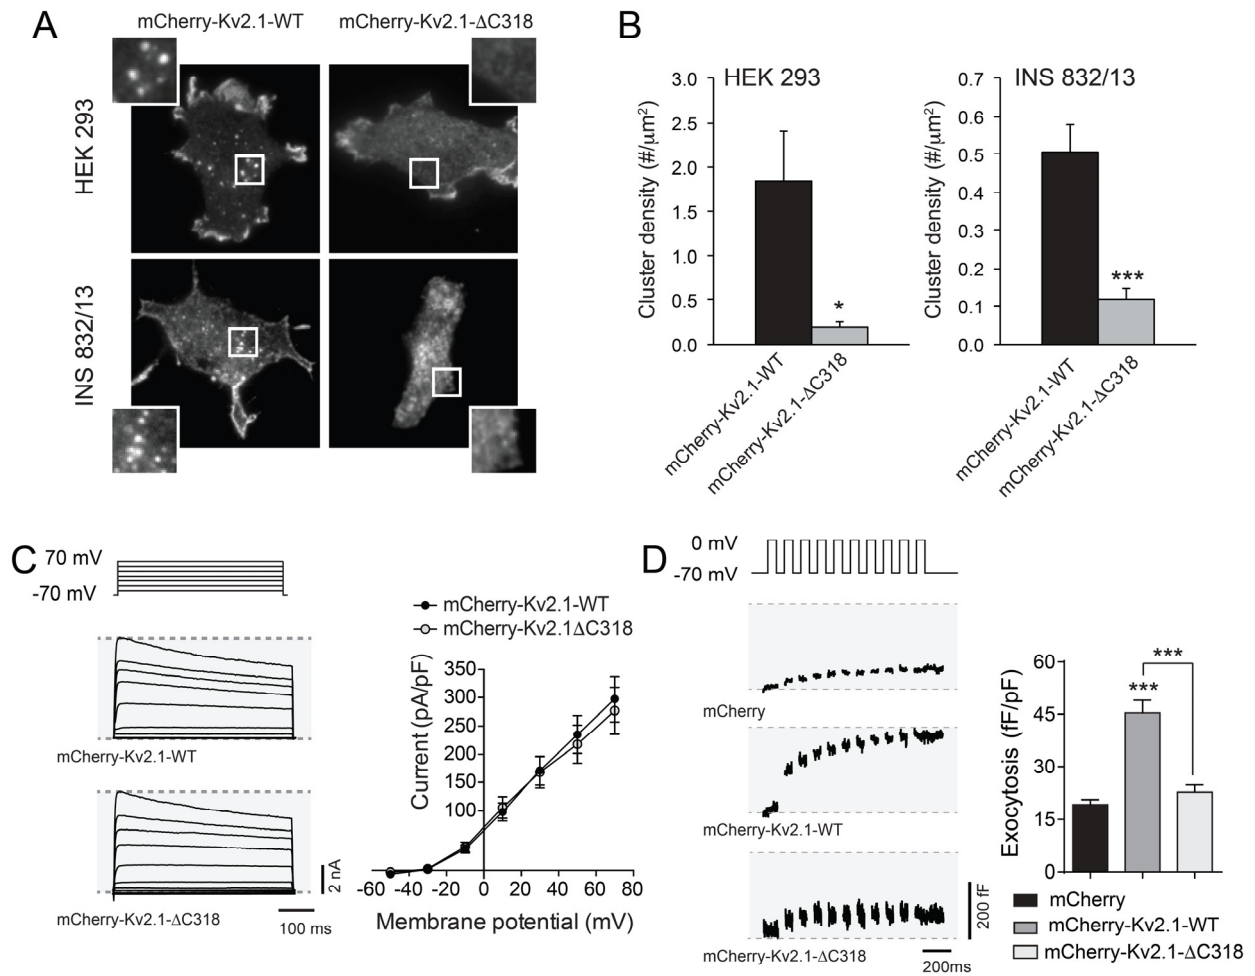



## SUPPLEMENTARY DATA

**Supplementary Figure 5.** Kv2.1- $\Delta$ C318 combines retains some ability to cluster by combining with endogenous Kv2.1 in INS 832/13 cells

A) Although much of the Myc-Kv2.1- $\Delta$ C318 expressed in INS 832/13 cells can be observed as extracellular Kv2.1 channel monomers (i.e. tetrameric single channels) a portion can still form clusters that are evident even as the amount of loaded protein on the gel is reduced. Membrane is blotted with anti-Myc.

B) The anti-Kv2.1 antibody used here is known to recognize a C-terminal epitope that is lacking in the Kv2.1- $\Delta$ C318 constructs. We confirm that this antibody recognizes mCherry-Kv2.1-WT and Myc-Kv2.1-WT, but not the respective truncated ( $\Delta$ C318) mutants. This blot also confirms the cell-surface expression of mCherry- Kv2.1-WT.

C) INS 832/13 cells expressing Myc-Kv2.1-WT, Myc-Kv2.1- $\Delta$ C318, or Myc alone were immunostained with anti-Myc (red) and anti-Kv2.1 (green; which recognizes full-length and endogenous Kv2.1 but not the truncated mutant). A high degree of colocalization was observed between the truncated Kv2.1 and endogenous Kv2.1, suggesting the interaction of Myc-Kv2.1- $\Delta$ C318 with endogenous Kv2.1 channels. Scale bar is 10  $\mu$ m.

D) Density of native Kv2.1 clusters, assessed by immunostaining with the anti-Kv2.1 antibody and imaged with TIRF microscopy, in INS 832/13 cells expressing Myc alone or Myc-Kv2.1- $\Delta$ C318 (n=21, 34 cells). \*\*p<0.01

SUPPLEMENTARY DATA

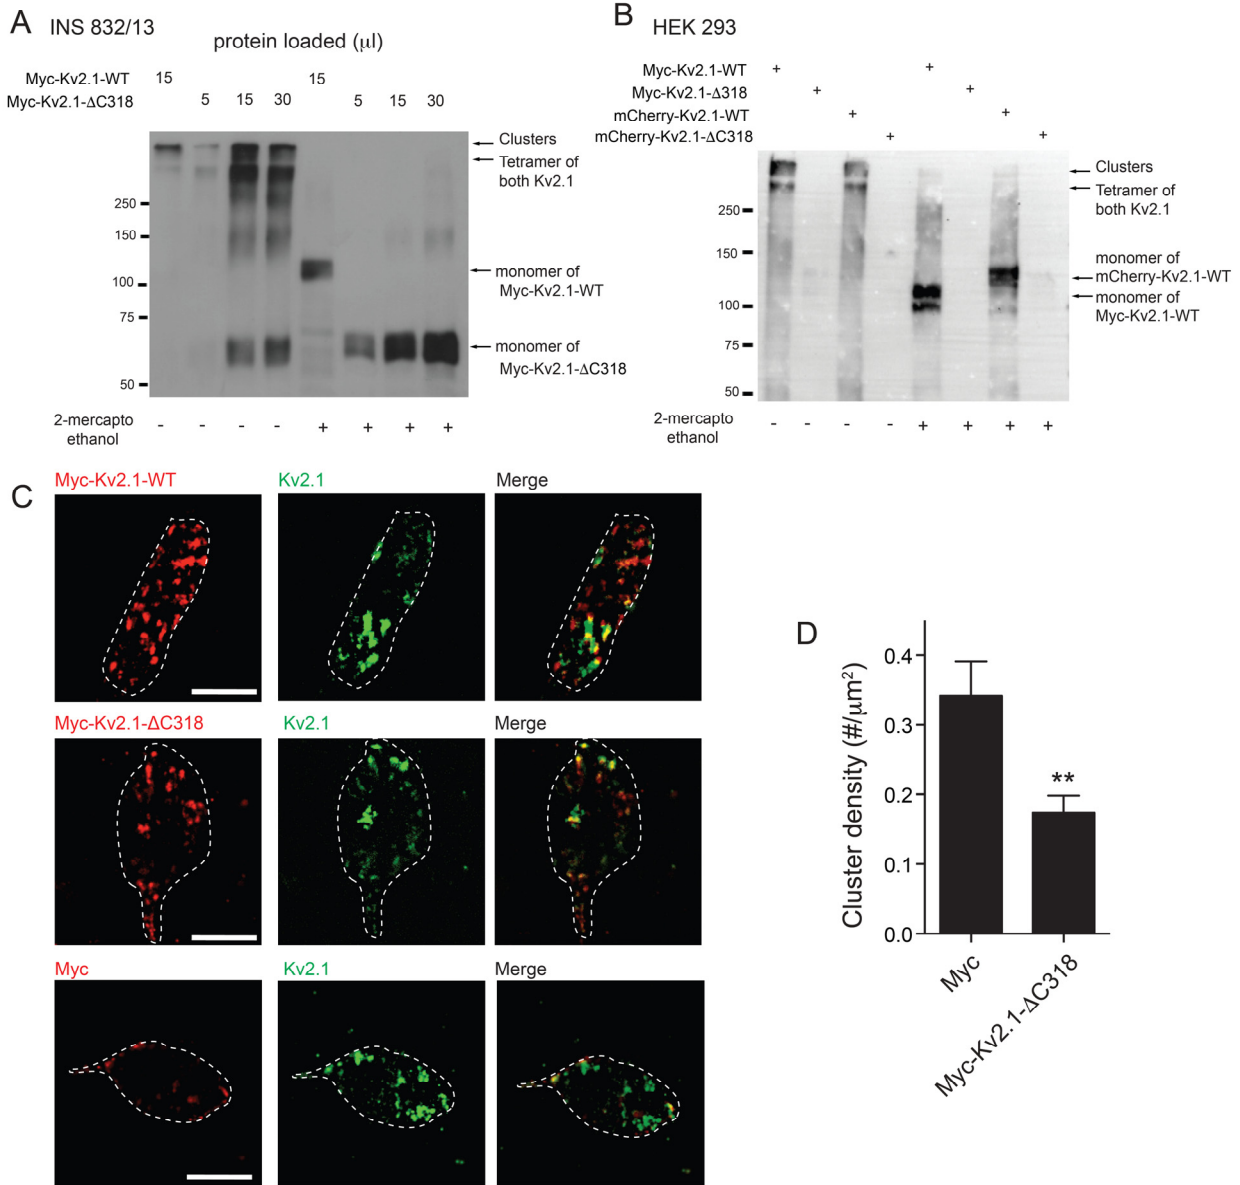

SUPPLEMENTARY DATA

**Supplementary Figure 6.** Up-regulation of Kv2.1 enhances depolarization-induced exocytosis at low and high glucose in INS-1 832/13 cells.

Exocytosis was elicited by a series of 10 depolarizations from -70 to 0 mV and measured as increases in cell capacitance in INS-1 832/13 cells following transfection with a control plasmid (mCherry) or the mCherry-tagged wild-type Kv2.1 (mCherry-Kv2.1-WT). Experiments were performed after a 1 hour pre-incubation at 1 mM glucose and subsequent exposure of cells to 1 or 16.7 mM glucose in the patch-clamp bath solution.

A) Representative membrane capacitance responses.

C) Cumulative exocytotic responses over the series of 10 membrane depolarizations. n=26,36,25,17 cells.

\*\*\*-p<0.001 compared with the mCherry groups.

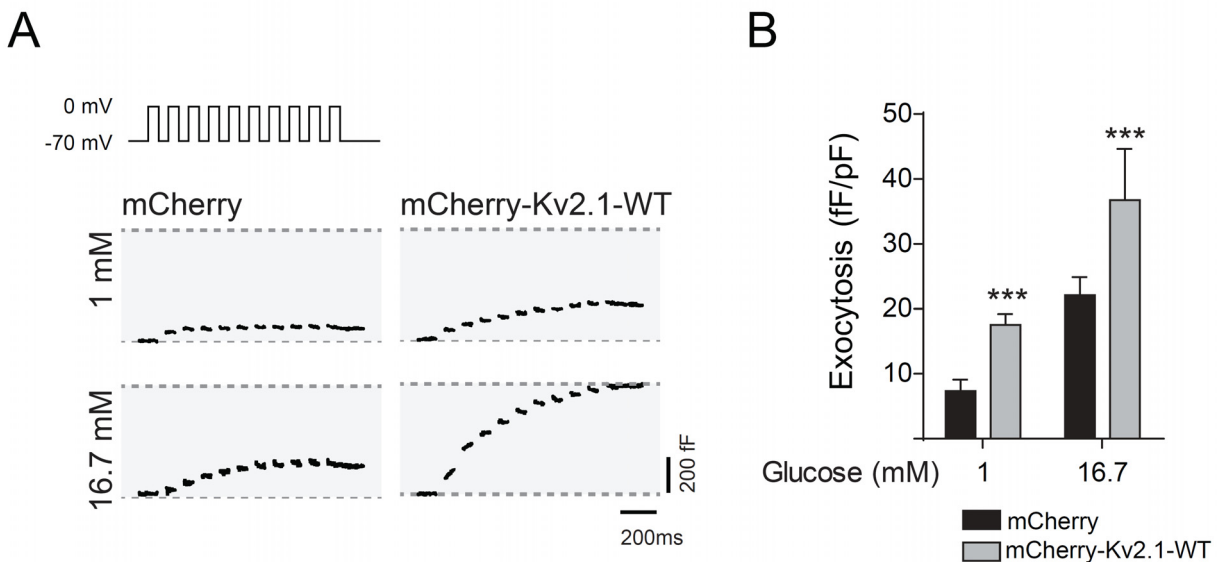

SUPPLEMENTARY DATA

**Supplementary Figure 7.** No effect of prior glucose-stimulation on Kv currents recorded from human  $\beta$ -cells under the whole-cell patch-clamp condition.

Kv currents were recorded from human  $\beta$ -cells, positively identified by insulin immunostaining, under glucose-stimulation conditions known to amplify the exocytotic response (Ferdaoussi et al, JCI, 2015).

A) Cells were pre-incubated at 1 mM glucose for 1 hour, and then exposed to 1 or 10 mM glucose in the bath solution for 15-30 minutes prior to making the whole-cell patch-clamp (at arrow) in order to test whether the resulting Kv currents were altered by glucose-treatment.

B) Current-voltage relationship of Kv currents elicited from a holding potential of -70 mV, measured from human  $\beta$ -cells (n=28 and 50 cells from 6 donors).

C) Voltage-dependence of steady-state inactivation of Kv currents from human  $\beta$ -cells from holding potentials ranging between -130 and 10 mV (n=35 and 40 cells from 6 donors).

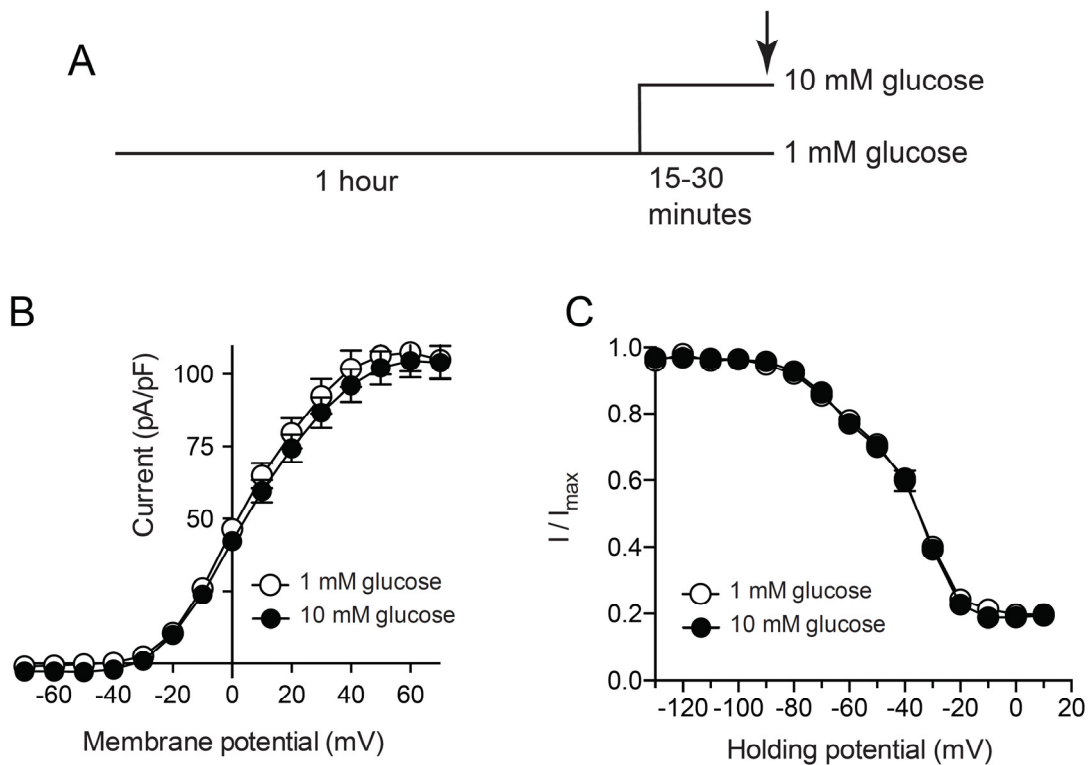

SUPPLEMENTARY DATA

**Supplementary Figure 8.** Secretory dysfunction of islets from donors with T2D used in Figure 8J compared with matched controls.

Impaired insulin secretion was confirmed in the T2D islets (n=3 donors) used for rescue experiments in Figure 8J compared with non-diabetic donors (n=3 donors) matched for age (53.7+/-3.3 versus 51.7+/-2.8), sex (2F and 1M in each group), and BMI (28.6+/-3.8 versus 28.4+/-1.2).

A) Insulin content was lower in islets from T2D donors, although this did not reach statistical significance.

B) Insulin secretion, as a percentage of insulin content, in response to 16.7 mM glucose in static incubation experiments was reduced in T2D islets.

C) The stimulation index (fold change in insulin secretion from 1 to 16.7 mM glucose) was reduced in the T2D islets).

\*-p<0.05 as indicated; \*\*-p<0.01 compared with ND; and \*\*\*-p<0.001 compared with the ND 1 mM glucose.

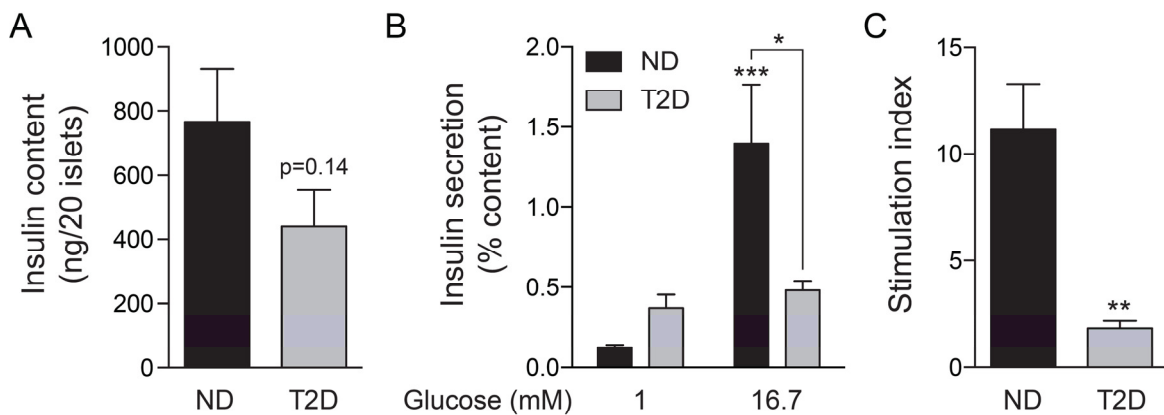

Supplement: DB161170SupplementaryData.pdf [file DB161170SupplementaryData.pdf]
